# Supplementary material for: A Comprehensive Mapping of HIV-1 Genotypes in Various Risk Groups and Regions across China Based on a Nationwide Molecular Epidemiologic Survey
Source: PLoS One. 2012 Oct 8;7(10):e47289. doi: 10.1371/journal.pone.0047289 (PMC3466245; doi:10.1371/journal.pone.0047289)
Supplement: Table S1 — Estimated numbers and proportions of HIV-1 infections for region- and risk-specific subgroups in China. (XLS) [file pone.0047289.s001.xls]

## Sheet: Table S1 
Table S1. Estimated numbers and proportions of HIV-1 infections for region- and risk-specific subgroups in China.
Region	Province	Risk Group	No. of reported cases (a)	Corrected No. of reported cases represented in the study (d)	No. genotyped (c)	HIV-1 genotype* (p)												Sum of raw (upper)(c) and corrected (lower) (d'): No. of genotypes
						CRF07_BC	CRF08_BC	CRF01_AE	B'	A	B	C	G	CRF02_AG	CRF06_cpx	BC	Other discordant genotype
Northeastern	Heilongjiang	Heterosexual	43	43	13	3 (23.1%)		5 (38.5%)	3 (23.1%)	1 (7.7%)	1 (7.7%)							13
						10		17	10	3	3							43
		MSM	27	27	7			2 (28.6%)			5 (71.4%)							7
								8			19							27
		BLD	5	5	2	1 (50.0%)			1 (50.0%)									2
						3			3									6
		OTH	16	16	1						1 (100.0%)							1
											16							16
		IDU	14	Excluded from the analysis (n=15, 14.2 %)
		MCT	1
	Heilongjiang total	raw	106	91	23	4		7	4	1	7							23
		corrected				13		25	13	3	38							92
	Jilin	Heterosexual	67	67	23	1 (4.3%)		4 (17.4%)	2 (8.7%)	1 (4.3%)	1 (4.3%)	5 (21.7%)		3 (13.0%)	1 (4.3%)	2 (8.7%)	3 (13.0%)	23
						3		12	6	3	3	15		9	3	6	9	69
		MSM	21	21	7			5 (71.4%)			1 (14.3%)						1 (14.3%)	7
								15			3						3	21
		Plasma	1	1	1				1 (100.0%)									1
									1									1
		NA	33	33	7			3 (42.9%)	3 (42.9%)							1 (14.2%)		7
								14	14							5		33
		IDU	4	Excluded from the analysis (n=8, 6.2%)
		BT	3
		Other	1
	Jilin total	raw	130	122	38	1		12	6	1	2	5		3	1	3	4	38
		corrected				3		41	21	3	6	15		9	3	11	12	124
	Liaoning	IDU	36	36	1	1 (100%)												1
						36												36
		Heterosexual	51	51	13	2 (15.4%)		5 (38.5%)	2 (15.4%)		4 (30.8%)							13
						8		20	8		16							52
		MSM	57	57	20			12 (60.0%)	1 (5.0%)		6 (30.0%)						1 (5.0%)	20
								34	3		17						3	57
		BLD	3	3	2			1 (50.0%)	1 (50.0%)									2
								2	2									4
		NA	32	32	4		1 (25.0%)	2 (50.0%)			1 (25.0%)							4
							8	16			8							32
		FPD	3	Excluded from the analysis (n=9, 4.8%)
		Other	6
	Liaoning total	raw	188	179	40	3	1	20	4		11						1	40
		corrected				44	8	72	13		41						3	181
	Northeastern total	raw	424	392	101	8	1	39	14	2	20	5		3	1	3	5	101
		corrected				60	8	138	47	6	85	15		9	3	11	15	397
Eastern	Beijing	IDU	117	117	2	2 (100.0%)												2
						117												117
		Heterosexual	83	83	10	1 (10.0%)		3 (30.0%)	2 (20.0%)	1 (10.0%)	2 (20.0%)			1 (10.0%)				10
						8		25	17	8	17			8				83
		MSM	157	157	27			7 (25.9%)	5 (18.5%)		15 (55.6%)							27
								41	29		87							157
		NA	105	105	3	1 (33.3%)					1 (33.3%)						1 (33.3%)	3
						35					35						35	105
		FPD	6	Excluded from the analysis (n=20, 4.1 %)
		BT	4
		Other	10
	Beijing total	raw	482	462	42	4		10	7	1	18			1			1	42
		corrected				160		66	46	8	139			8			35	462
	Fujian	Heterosexual	103	103	13			11 (84.6%)	1 (7.7%)			1 (7.7%)						13
								87	8			8						103
		MSM	4	4	1			1 (100.0%)										1
								4										4
		NA	16	16	3		1 (33.3%)	2 (66.7%)										3
							5	11										16
		IDU	30	Excluded from the analysis (n=37, 23.1 %)
		FPD	1
		BT	1
		MCT	1
		Other	4
	Fujian total	raw	160	123	17		1	14	1			1						17
		corrected					5	102	8			8						123
	Guangdong	IDU	3238	3238	34	8 (23.5%)	10 (29.4%)	15 (44.1%)	1 (2.9%)									34
						762	952	1429	95									3238
		Heterosexual	861	861	28	5 (17.9%)	1 (3.6%)	17 (60.7%)	2 (7.2%)			3						28
						154	31	522	61			92						860
		MSM	81	81	3	1 (33.3%)		1 (33.3%)									1 (33.3%)	3
						27		27									27	81
		Plasma	27	27	2			2 (100.0%)										2
								27										27
		NA	277	277	5	1 (20.0%)		4 (80.0%)										5
						55		222										277
		BT	29	Excluded from the analysis (n=67, 1.47%)
		MCT	13
		Other	25
	Guangdong total	raw	4551	4484	72	15	11	39	3			3					1	72
		corrected				998	983	2227	156			92					27	4483
	Hebei	Heterosexual	45	45	12		1 (8.3%)	3 (25.0%)	6 (50.0%)		1 (8.3%)	1 (8.3%)						12
							4	11	23		4	4						46
		MSM	35	35	5			5 (100.0%)										5
								35										35
		Plasma	8	8	3				3 (100.0%)									3
									8									8
		BLD	10	10	2				2 (100.0%)									2
									10									10
		MCT	3	3	2				2 (100.0%)									2
									3									3
		NA	23	23	4			1 (25.0%)	1 (25.0%)		2 (50.0%)							4
								6	6		11							23
		IDU	10	Excluded from the analysis (n=10, 7.5%)
	Hebei total	raw	134	124	28		1	9	14		3	1						28
		corrected					4	52	50		15	4						125
	Jiangsu	IDU	71	71	10	9 (90.0%)	1 (10.0%)											10
						64	7											71
		Heterosexual	117	117	38	9 (23.7%)	6 (15.8%)	11 (28.9%)	7 (18.4%)	2 (5.3%)		3 (7.9%)						38
						28	19	34	22	6		9						118
		MSM	19	19	11	2 (18.2%)		7 (63.6%)			2 (18.2%)							11
						3		12			3							18
		BLD	32	32	1				1 (100.0%)									1
									32									32
		OTH	7	7	1		1 (100.0%)											1
							7											7
		NA	47	47	2				2 (100.0%)									2
									47									47
		FPD	6	Excluded from the analysis (n=8, 2.7 %)
		MCT	2
	Jiangsu total	raw	301	293	63	20	8	18	10	2	2	3						63
		corrected				95	33	46	101	6	3	9						293
	Shandong	IDU	34	34	5	3 (60.0%)	1 (20.0%)										1 (20%)	5
						20	7										7	34
		Heterosexual	138	138	30	9 (30.0%)	6 (20.0%)	8 (26.7%)	3 (10.0%)		1 (3.3.0%)	1 (3.3%)				2 (6.7%)		30
						41	28	37	14		5	5				9		139
		MSM	28	28	7			4 (57.1%)	1 (14.3%)		2 (28.6%)							7
								16	4		8							28
		BLD	12	12	3				1 (33.3%)		2 (66.7%)							3
									4		8							12
		MCT	12	12	5		4 (8.0%)		1 (2.00%)									5
							10		2									12
		OTH	5	5	2		1 (50.0%)	1 (50.0%)										2
							3	3										6
		NA	39	39	3	1 (33.3%)			1 (33.3%)								1 (33.3%)	3
						13			13								13	39
		FPD	5	Excluded from the analysis (n=5, 1.9%)
	Shandong total	raw	273	268	55	13	12	13	7		5	1				2	2	55
		corrected				74	48	56	37		21	5				9	20	270
	Shanghai	IDU	196	196	6	2 (33.3%)	2 (33.3%)	2 (33.3%)										6
						65	65	65										195
		Heterosexual	252	252	25	4 (16.0%)	1 (4.0%)	12 (48.0%)	4 (16.0%)		1 (4.0%)	2 (8.0%)	1 (4.0%)					25
						40	10	121	40		10	20	10					251
		MSM	75	75	18	1 (5.6%)	1 (5.6%)	14 (77.8%)			2 (11%)							18
						4	4	58			8							74
		Plasma	25	25	5				5 (100%)									5
									25									25
		BLD	22	22	3				2 (66.7%)		1 (33.3%)							3
									15		7							22
		NA	115	115	2	1(50.0)					1 (50.0%)							2
						58					58							116
		Other	9	Excluded from the analysis (n=9, 1.3%)
	Shanghai total	raw	694	685	59	8	4	28	11		5	2	1					59
		corrected				167	79	244	80		83	20	10					683
	Tianjin	IDU	17	17	3	2 (66.7%)		1 (33.3%)										3
						11		6										17
		Heterosexual	24	24	3				3 (100.0%)									3
									24									24
		MSM	13	13	4			4 (100.0%)										4
								13										13
		BT	2	Excluded from the analysis (n=11, 16.9 %)
		Other	2
		NA	7
	Tianjin total	raw	65	54	10	2		5	3									10
		corrected				11		19	24									54
	Zhejiang	IDU	103	103	2	2 (100.0%)												2
						103												103
		Heterosexual	263	263	53	8 (15.1%)	9 (17.0%)	26 (49.1%)	9 (17%)					1 (1.9%)				53
						40	45	129	45					5				264
		MSM	29	29	8	1 (12.5%)		6 (75%)	1 (12.5%)									8
						4		22	4									30
		Plasma	12	12	1			1 (100.0%)										1
								12										12
		MCT	8	8	2		1 (50.0%)	1 (50.0%)										2
							4	4										8
		NA	61	61	6	1 (16.7%)	1 (16.7%)	2 (33.3%)	1 (16.7%)					1 (16.7%)				6
						10	10	20	10					10				60
		BT	7	Excluded from the analysis (n=14, 2.9%)
		Other	7
	Zhejiang total	raw	490	476	72	12	11	36	11					2				72
		corrected				157	59	187	59					15				477
	Eastern total	raw	7150	6969	418	74	48	172	67	3	33	11	1	3		2	4	418
		corrected				1662	1211	2999	561	14	261	138	10	23		9	82	6970
Central	Anhui	Heterosexual	109	109	28	4 (14.3%)	4 (14.3%)	2 (7.1%)	18 (64.3%)									28
						16	16	8	70									110
		MSM	11	11	2			2 (100.0%)										2
								11										11
		Plasma	187	187	27				27 (100.0%)									27
									187									187
		BLD	26	26	2				2 (100.0%)									2
									26									26
		NA	36	36	1				1 (100.0%)									1
									36									36
		IDU	19	Excluded from the analysis (n=57, 13.4%)
		MCT	29
		Other	9
	Anhui total	raw	426	369	60	4	4	4	48									60
		corrected				16	16	19	319									370
	Henan	Heterosexual	517	517	14				14 (100.0%)									14
									517									517
		Plasma	520	520	19				19 (100.0%)									19
									520									520
		BLD	265	265	8				8 (100.0%)									8
									265									265
		MCT	89	89	2				2 (100.0%)									2
									89									89
		IDU	15	Excluded from the analysis (n=128, 8.4 %)
		MSM	7
		Other	18
		NA	88
	Henan total	raw	1519	1391	43				43									43
		corrected							1391									1391
	Hubei	IDU	38	38	8	6 (75.0%)		2 (25.0%)										8
						29		10										39
		Heterosexual	131	131	33	5 (6.1%)		12 (36.4%)	15 (45.5%)							1 (3.0%)		33
						20		48	60							4		132
		MSM	15	15	3	2 (66.7%)					1 (33.3%)							3
						10					5							15
		Plasma	49	49	8				8 (100.0%)									8
									49									49
		BLD	38	38	1	1 (100.0%)												1
						38												38
		MCT	7	7	1				1 (100.0%)									1
									7									7
		NA	41	41	1							1 (100.0%)						1
												41						41
		Other	1	Excluded from the analysis (n=1, 0.3 %)
	Hubei total	raw	320	319	55	14		14	24		1	1				1		55
		corrected				97		58	116		5	41				4		321
	Hunan	IDU	635	635	31	6 (19.4%)	1 (30.3%)	22 (71.0%)	2 (6.5%)									31
						123	20	451	41									635
		Heterosexual	327	327	23	2 (8.7%)		15 (65.2%)	3 (13.0%)			2 (8.7%)					1 (4.3%)	23
						28		213	43			28					14	326
		MSM	7	Excluded from the analysis (n=86, 8.2%)
		FPD	5
		BT	5
		MCT	5
		Other	15
		NA	49
	Hunan total	raw	1048	962	54	8	1	37	5			2					1	54
		corrected				151	20	664	84			28					14	961
	Jiangxi	IDU	133	133	25	2 (8.0%)	2 (8.0%)	16 (64.0%)	4 (16.0%)			1 (4.0%)						25
						11	11	85	21			5						133
		Heterosexual	71	71	17	7 (41.2%)		9 (52.9%)	1 (5.9%)									17
						29		38	4									71
		NA	16	16	2			2 (100.0%)										2
								16										16
		MCT	1	Excluded from the analysis (n=2, 0.9%)
		Other	1
	Jiangxi total	raw	222	220	44	9	2	27	5			1						44
		corrected				40	11	139	25			5						220
	Shanxi	Heterosexual	83	83	8		4 (50.0%)		4 (50.0%)									8
							42		42									84
		Plasma	31	31	4				4 (100.0%)									4
									31									31
		BLD	28	28	1				1 (100.0%)									1
									28									28
		NA	28	28	1				1 (100.0%)									1
									28									28
		IDU	47	Excluded from the analysis (n=69, 28.8%)
		MSM	3
		MCT	14
		Other	5
	Shanxi total	raw	239	170	14		4		10									14
		corrected					42		129									171
	Central total	raw	3774	3431	270	35	11	82	135		1	4				1	1	270
		corrected				304	89	880	2064		5	74				4	14	3434
Northwestern	Gansu	IDU	17	17	1	1 (100.0%)												1
						17												17
		Heterosexual	20	20	7	4 (57.1%)	2 (28.6%)		1 (14.3%)									7
						11	6		3									20
		MSM	7	7	1			1 (100.0%)										1
								7										7
		FPD	3	Excluded from the analysis (n=13, 22.8 %)
		BT	7
		MCT	3
	Gansu total	raw	57	44	9	5	2	1	1									9
		corrected				28	6	7	3									44
	Neimenggu	IDU	10	10	2			2 (100.0%)										2
								10										10
		Heterosexual	15	15	3				3 (100.0%)									3
									15									15
		MSM	4	4	1				1 (100.0%)									1
									4									4
		NA	13	13	1				1 (100.0%)									1
									13									13
		BT	4	Excluded from the analysis (n=4, 8.7%)
	Neimenggu total	raw	46	42	7			2	5									7
		corrected						10	32									42
	Ningxia	IDU	24	24	7	7 (100.0%)												7
						24												24
		Heterosexual	12	12	1			1 (100.0%)										1
								12										12
		NA	3	Excluded from the analysis (n=3, 7.7%)
	Ningxia total	raw	39	36	8	7		1										8
		corrected				24		12										36
	Qinghai	IDU	10	10	1	1 (100.0%)												1
						10												10
		Heterosexual	1	1	1				1 (100.0%)									1
									1									1
		BLD	4	4	1				1 (100.0%)									1
									4									4
	Qinghai total	raw	15	15	3	1			2									3
		corrected				10			5									15
	Shaanxi	IDU	39	39	11	8 (72.8%)			1 (9.1%)			2 (18.1%)						11
						28			4			7						39
		Heterosexual	25	25	4			1 (25.0%)	3 (75%)									4
								6	19									25
		BLD	6	6	3	1 (33.3%)			2 (66.7%)									3
						2			4									6
		NA	15	15	3	1 (33.3%)			2 (66.7%)									3
						5			10									15
		MSM	4	Excluded from the analysis (n=6, 6.6%)
		Other	2
	Shaanxi total	raw	91	85	21	10		1	8			2						21
		corrected				35		6	37			7						85
	Xinjiang	IDU	4192	4192	108	108 (100.0%)												108
						4192												4192
		Heterosexual	1119	1119	36	35 (98.2%)			1 (27.8%)									36
						1088			31									1119
		MCT	48	48	3	3 (100.0%)												3
						48												48
		OTH	99	99	2	2 (100.0%)												2
						99												99
		NA	519	519	6	6 (100.0%)												6
						519												519
		MSM	8	Excluded from the analysis (n=41, 0.7%)
		FPD	10
		BT	23
	Xinjiang total	raw	6018	5977	155	154			1									155
		corrected				5946			31									5977
	Xizang (Tibet)	MSM	1	1	1			1 (100.0%)										1
								1										1
	Xizang total	raw	1	1	1			1										1
		corrected						1										1
	Northwestern total	raw	6267	6200	204	177	2	6	17			2						204
		corrected				6043	6	36	108			7						6200
Southwestern	Chongqing	IDU	544	544	36	25 (69.4%)	6 (16.7%)	5 (13.9%)										36
						378	91	76										545
		Heterosexual	241	241	40	23 (57.5%)	9 (22.5%)	2 (5.0%)	3 (7.5%)		1 (2.5%)					1 (2.5%)	1 (2.5%)	40
						139	54	12	18		6					6	6	241
		MSM	18	18	4	3 (75.0%)		1 (25.0%)										4
						14		4										18
		MCT	9	9	3	2 (66.7%)		1 (33.3%)										3
						6		3										9
		NA	53	53	4	2 (50.0%)	2 (50.0%)											4
						27	27											54
	Chongqing total	raw	865	865	87	55	17	9	3		1					1	1	87
		corrected				564	172	95	18		6					6	6	867
	Guangxi	IDU	2278	2278	32	2 (6.3%)	18 (56.3%)	10 (31.3%)								1 (3.1%)	1 (3.1%)	32
						142	1281	712								71	71	2277
		Heterosexual	2643	2643	77	5 (6.5%)	14 (18.2%)	56 (72.7%)	1 (1.3%)							1 (1.3%)		77
						172	481	1922	34							34		2643
		MSM	16	16	1												1 (100.0%)	1
																	16	16
		BT	24	Excluded from the analysis (n=699, 12.4%)
		MCT	43
		Other	31
		NA	601
	Guangxi total	raw	5636	4937	110	7	32	66	1							2	2	110
		corrected				314	1762	2634	34							105	87	4936
	Guizhou	IDU	540	540	18	3 (16.7%)		14 (77.8%)	1 (5.6%)									18
						90		420	30									540
		Heterosexual	321	321	3			3 (100.0%)										3
								321										321
		NA	117	117	2			2 (100.0%)										2
								117										117
		MSM	44	Excluded from the analysis (n=59, 5.6%)
		Other	15
	Guizhou total	raw	1037	978	23	3		19	1									23
		corrected				90		858	30									978
	Sichuan	IDU	1663	1663	17	14 (82.4%)		2 (11.8%)									1 (5.8%)	17
						1370		196									98	1664
		Heterosexual	793	793	6	2 (33.3%)		2 (33.3%)	1 (16.7%)								1 (16.7%)	6
						264		264	132								132	792
		MSM	84	84	1			1 (100.0%)										1
								84										84
		FPD	18	Excluded from the analysis (n=438, 14.7%)
		BT	24
		Other	60
		NA	336
	Sichuan total	raw	2978	2540	24	16		5	1								2	24
		corrected				1634		544	132								230	2540
	Yunnan	IDU	3258	3258	52	12 (23.1%)	26 (50.0%)	3 (5.8%)	3 (5.8%)			2 (3.8%)				4 (7.7%)	2 (3.8%)	52
						752	1629	189	189			123				251	126	3259
		Heterosexual	3364	3364	95	14 (14.7%)	38 (40.0%)	24 (25.3%)	3 (3.2%)			3 (3.2%)				5 (5.3%)	8 (8.4%)	95
						496	1346	850	106			106				177	283	3364
		MCT	120	120	4		2 (50%)	1 (25%)									1 (25%)	4
							60	30									30	120
		NA	1083	1083	16	3 (18.8%)	9 (56.3%)	2 (12.5%)				1 (6.2%)				1 (6.2%)		16
						203	609	135				68				68		1083
		FPD	5	Excluded from the analysis (n=140, 1.8 %)
		BT	48
		Other	87
	Yunnan total	raw	7965	7825	168	29	75	30	6			6				10	11	167
		corrected				1451	3644	1204	295			297				496	439	7826
	Southwestern total	raw	18481	17145	412	110	124	130	12		1	6				13	16	412
		corrected				4053	5578	5335	509		6	297				607	762	17147
